# Supplementary material
Source: PubMed Central journal article supplement (PMC7903253)
Supplement: jama-e210658-s003.pdf [file jama-e210658-s003.pdf]

## **Data Sharing Statement**

### **Data**

**Data available:** Yes

**Data types:** Deidentified participant data

**How to access data:** fanny.feuillet@univ-nantes.fr

**When available:** With publication

### **Supporting Documents**

**Document types:** Statistical/analytic code, Informed consent form

**How to access documents:** fanny.feuillet@univ-nantes.fr

**When available:** With publication

### **Additional Information**

**Who can access the data:** Researchers whose proposed use of the data has been approved

**Types of analyses:** For a specified purpose

**Mechanisms of data availability:** With investigator support and after approval of a proposal with a signed data access agreement
